# Supplementary material for: Enteroviral 2B Interacts with VDAC3 to Regulate Reactive Oxygen Species Generation That Is Essential to Viral Replication
Source: MDPI journal article supplement (doi:10.3390/v14081717), 2022-08-04
Supplement: s1 [file s1]

**Table S1.** Mitochondrial proteins differentially co-immunoprecipitated with 2B

| <b>Symbol</b> | <b>Entrez Gene Name</b>                               | <b>Protein Accession Number</b> | <b>Heavy/Light Ratio</b> | <b>Heavy/Light Count</b> |
|---------------|-------------------------------------------------------|---------------------------------|--------------------------|--------------------------|
| SDHB          | succinate dehydrogenase complex iron sulfur subunit B | P21912                          | <b>1183.487</b>          | 6                        |
| UQCRB         | ubiquinol-cytochrome c reductase binding protein      | P14927                          | <b>966.47</b>            | 3                        |
| ATP5MG        | ATP Synthase Membrane Subunit G                       | O75964                          | <b>848.136</b>           | 2                        |
| UQCRC1        | ubiquinol-cytochrome c reductase core protein 1       | P31930                          | <b>597.584</b>           | 9                        |
| VDAC3         | voltage-dependent anion channel 3                     | Q9Y277                          | <b>548.569</b>           | 2                        |
| NDUFS1        | NADH:ubiquinone oxidoreductase core subunit S1        | P28331                          | <b>478.214</b>           | 4                        |
| ATP5PF        | ATP synthase peripheral stalk subunit F6              | P18859                          | <b>331.494</b>           | 4                        |
| NDUFV2        | NADH:ubiquinone oxidoreductase core subunit V2        | P19404                          | <b>320.749</b>           | 2                        |
| NDUFA7        | NADH:ubiquinone oxidoreductase subunit A7             | O95182                          | <b>220.892</b>           | 3                        |
| ATP5PD        | ATP Synthase Peripheral Stalk Subunit D               | O75947                          | <b>206.964</b>           | 6                        |

Symbol refers to the official symbol of the protein-coding gene; Entrez gene name refers to the full gene name provided by Entrez database; protein accession number is an unique identifier assigned to the protein by the UniProtKB/Swiss-Prot database; the heavy/light ratio refers to the ratio of the quantification values of the heavy (i.e. deuterated) and light (i.e. non-deuterated) quantification channels; heavy/light count refers to the number of peptide ratios used for calculation of a particular protein ratio.
